# Supplementary material for: Allicin suppressed Escherichia coli-induced urinary tract infections by a novel MALT1/NF-κB pathway
Source: Royal Society of Chemistry journal article supplement (doi:10.1039/d1fo03853b), 2022-01-01
Supplement: d1fo03853b1.pdf [file d1fo03853b1.pdf]

The rawdata of Figure1, Figure2, Figure3, Figure4, and Figure5:

[https://www.jianguoyun.com/p/DRerehoQ\\_NKICBjZkK8E](https://www.jianguoyun.com/p/DRerehoQ_NKICBjZkK8E)

The rawdata of Fig6a-1.: [https://www.jianguoyun.com/p/DX2LEusQ\\_NKICBjG1JoE](https://www.jianguoyun.com/p/DX2LEusQ_NKICBjG1JoE)

The rawdata of Fig6a-2.: [https://www.jianguoyun.com/p/DW9A\\_28Q\\_NKICBjH1JoE](https://www.jianguoyun.com/p/DW9A_28Q_NKICBjH1JoE)

The rawdata of Fig6a-3.: [https://www.jianguoyun.com/p/DT\\_hGM8Q\\_NKICBjh1JoE](https://www.jianguoyun.com/p/DT_hGM8Q_NKICBjh1JoE)

The rawdata of Fig6b-e.: [https://www.jianguoyun.com/p/DaGKRlAQ\\_NKICBjI1JoE](https://www.jianguoyun.com/p/DaGKRlAQ_NKICBjI1JoE)

The rawdata of Figure7, Figure8, Figure9 :

[https://www.jianguoyun.com/p/DdKQtPIQ\\_NKICBjB85oE](https://www.jianguoyun.com/p/DdKQtPIQ_NKICBjB85oE)

The rawdata of supplement Fig1-3.:

[https://www.jianguoyun.com/p/DSHxdKUQ\\_NKICBjC85oE](https://www.jianguoyun.com/p/DSHxdKUQ_NKICBjC85oE)

The rawdata of supplement Fig4.:

[https://www.jianguoyun.com/p/Dbst3HgQ\\_NKICBjD85oE](https://www.jianguoyun.com/p/Dbst3HgQ_NKICBjD85oE)
