# Supplementary material for: Allicin suppressed Escherichia coli-induced urinary tract infections by a novel MALT1/NF-κB pathway
Source: Royal Society of Chemistry journal article supplement (doi:10.1039/d1fo03853b), 2022-01-01
Supplement: d1fo03853b3.pdf [file d1fo03853b3.pdf]

**Supplement Figure 1. The structure of the 19 active ingredients in garlic.**

**Supplement Figure 2. Evaluation of the knockdown efficacy of different siRNAs.**

**Supplement Figure 3: Comparison of therapeutic effects of the three methods on infection and the relationship between NF- $\kappa$ B pathway and cytokines.** (a-d) The Violin plots of the changes of I $\kappa$ B $\alpha$ , p65 NF- $\kappa$ B, IL6, and IL-1 $\beta$ . (e-h) The correlation density map displayed the relationship between NF- $\kappa$ B pathway and cytokines. (i) Differences in the therapeutic scores among four therapies (\*\*P < 0.01).

**Supplement Figure 4. Determination of the histological effects of allicin on the livers of rats.**

**All liver samples were stained using hematoxylin–eosin ( $\times 200$  magnification, Scale Bar:100 $\mu$ m) for exploring the liver change.** Representative photomicrographs of H&E staining of paraffin-embedded bladder sections from Group 1 was the control group (10% DMSO i.p. + 10% DMSO); group 2 received allicin (10mg/kg) i.p. only; group 3 received allicin (50mg/kg) i.p. only; group 4 received *E. coli*; group 5 received allicin (50mg/kg) i.p.+ *E. coli* while group 6 received allicin (50mg/kg) i.p.+ *E. coli*.
